# Supplementary material for: Evaluation of Sample Preparation Methods for the Analysis of Reef-Building Corals Using 1H-NMR-Based Metabolomics
Source: Metabolites. 2019 Feb 13;9(2):32. doi: 10.3390/metabo9020032 (PMC6410050; doi:10.3390/metabo9020032)
Supplement: Supplementary file 1 [file metabolites-09-00032-s001.pdf]

## **Supplementary Materials for**

### **Evaluation of sample preparation methods for the analysis of reef-building corals by $^1\text{H}$ NMR based metabolomics**

Erik Andersson<sup>1,2</sup>, Rusty D. Day<sup>2,4</sup>, Julie M. Loewenstein<sup>1</sup>, Cheryl M. Woodley<sup>3</sup>, and Tracey B. Schock<sup>2</sup>

<sup>1</sup> The Graduate School at the University of Charleston, Charleston, SC 29412, USA

<sup>2</sup> National Institute of Standards and Technology, Chemical Science Division, Hollings Marine Laboratory, Charleston, SC 29412, USA

<sup>3</sup> National Oceanic and Atmospheric Administration, National Ocean Service, Hollings Marine Laboratory, Charleston, SC 29412, USA

<sup>4</sup> Marine Science and Nautical Training Academy (MANTA), 520 Folld Rd Ste 25 PMB 290, Charleston, SC 29412, USA

**Figure S1.** (a) Representative  $^1\text{H}$  NMR spectra and (b) PCA scores plot from the three extraction methods for frozen homogenates of both coral species. Metabolic profiles are relatively consistent within species, with slightly higher peak intensities from the methanol extraction ( $\uparrow$ ). Spectra are normalized to chemical shift standard TMS $\rho$  at 0.0 ppm. ACER = *Acropora cervicornis*; OFAV = *Orbicella faveolata*; BD = Bligh and Dyer extraction; Methanol = methanol extraction; MTBE = Methyl tert-butyl ether extraction.

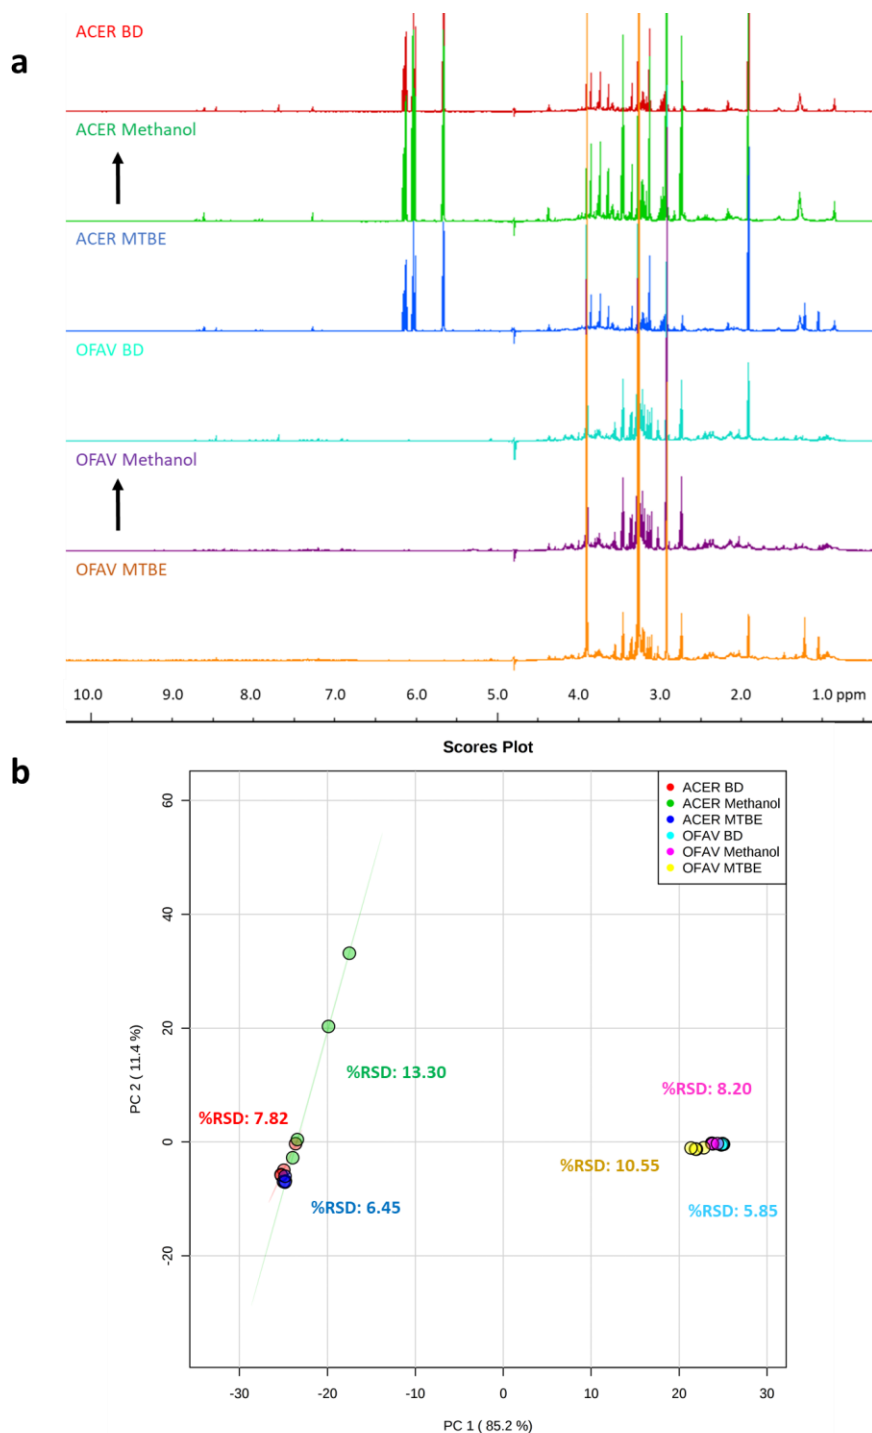

**Figure S2.** Representative  $^1\text{H}$  NMR spectra from lyophilized (black) and frozen (blue) *Orbicella faveolata* homogenates demonstrate visually similar metabolic profiles. Metabolites were extracted using the Bligh and Dyer extraction method. Spectra are normalized to chemical shift standard TMSP at 0.0 ppm.

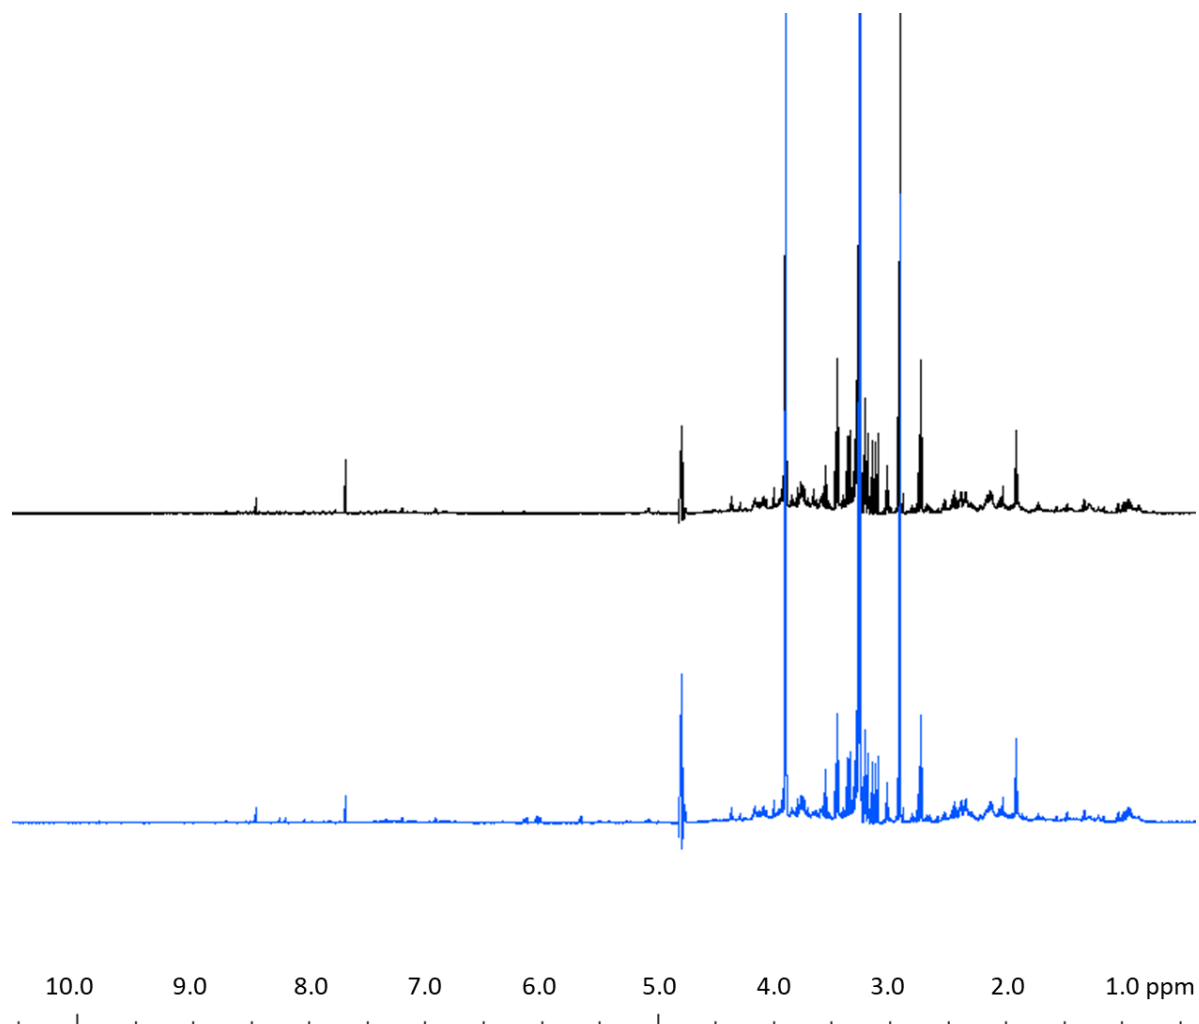

**Figure S3.** Representative  $^1\text{H}$  NMR spectra from nubbin (black) and tissue powder (blue) subsampling methods for unaffected *Porites compressa* samples shows much higher peak intensities resulting from the nubbin method. Samples were lyophilized and metabolites extracted using Bligh and Dyer extraction method. Spectra are normalized to chemical shift standard TMSP at 0.0 ppm.

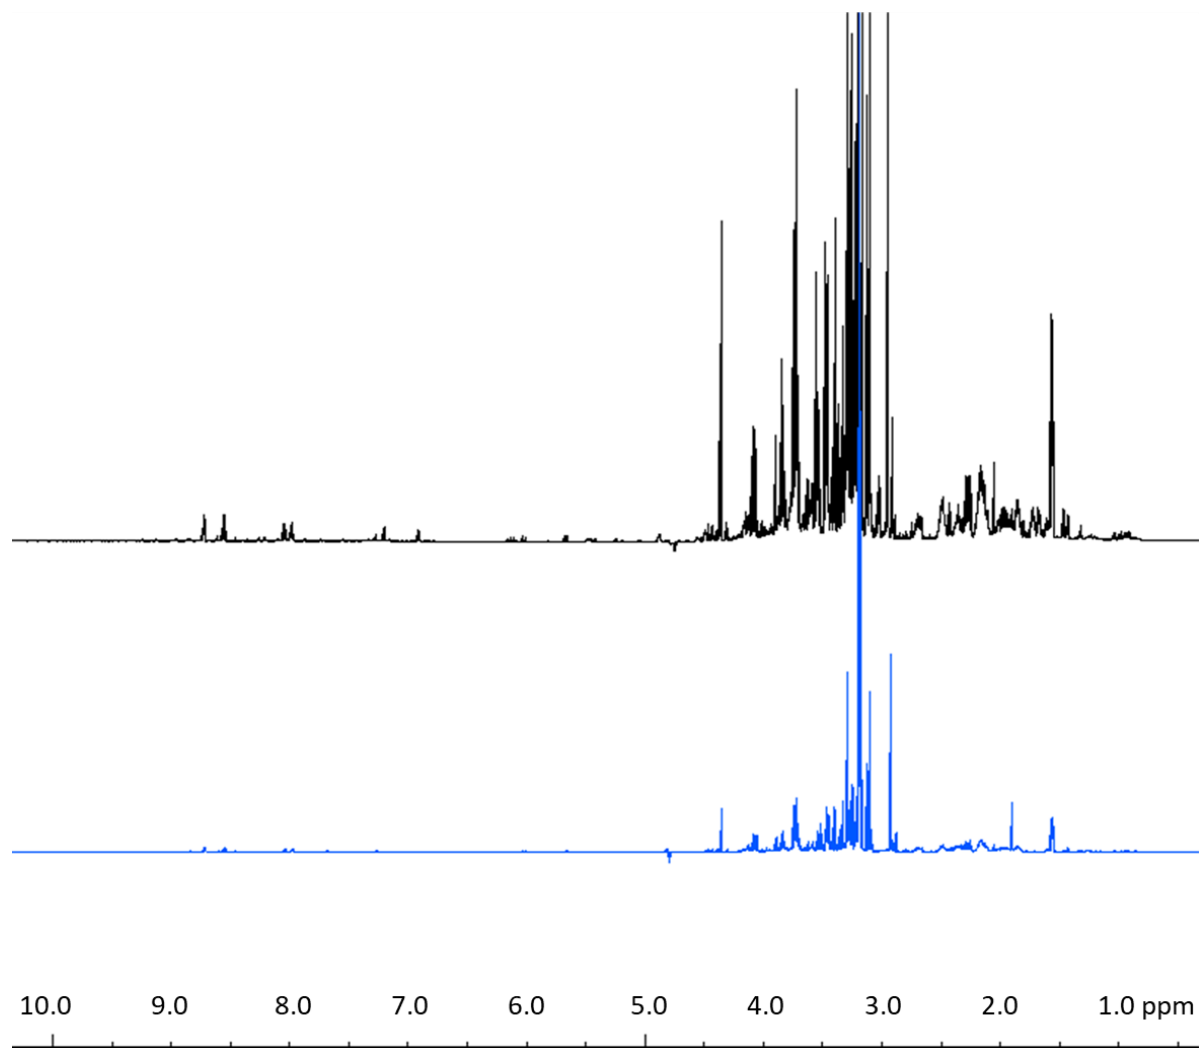

**Figure S4.** (a) Representative *Porites compressa*  $^1\text{H}$  NMR spectra of growth anomaly (black) and unaffected (blue) samples and (b) overlaid spectra region from technical replicates of a growth anomaly (black,  $n = 3$ ) and unaffected (blue,  $n = 3$ ) *P. compressa* sample. Although overall profiles appear similar, arrows indicate examples of features that differ in intensity between the two samples. Data were collected according to the recommended workflow developed from the current study: Samples were lyophilized, subsampled using the tissue powder method, and metabolites extracted using Bligh and Dyer extraction method. Spectra are normalized to chemical shift standard TMSP at 0.0 ppm.

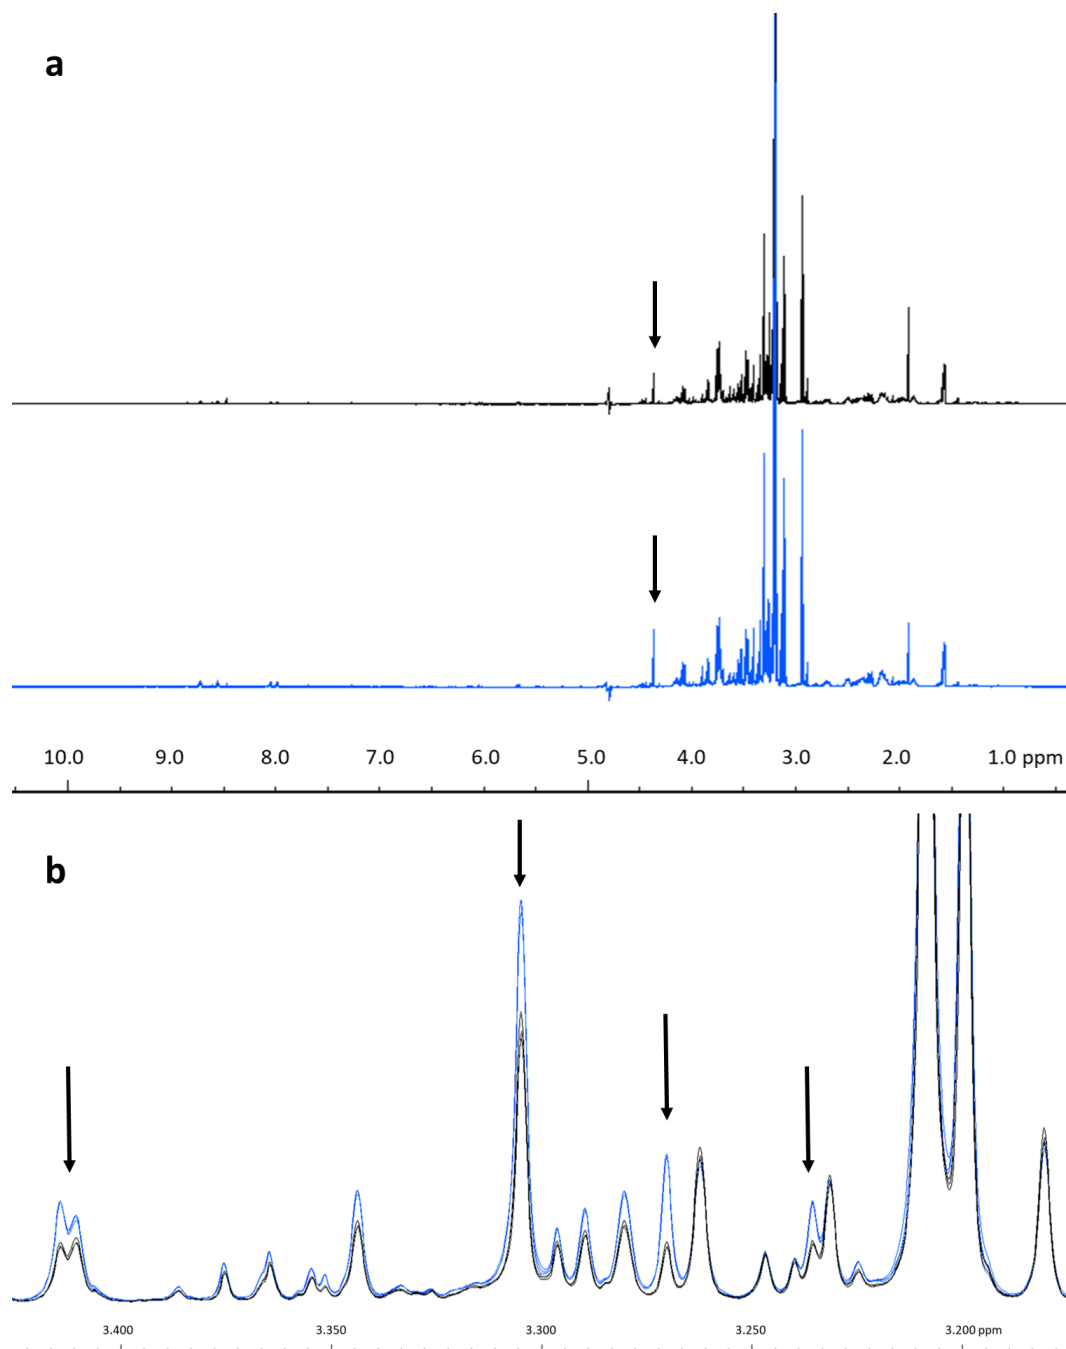

**Figure S5.** Diagram of processing steps for coral nubbin and tissue powder subsampling methods.

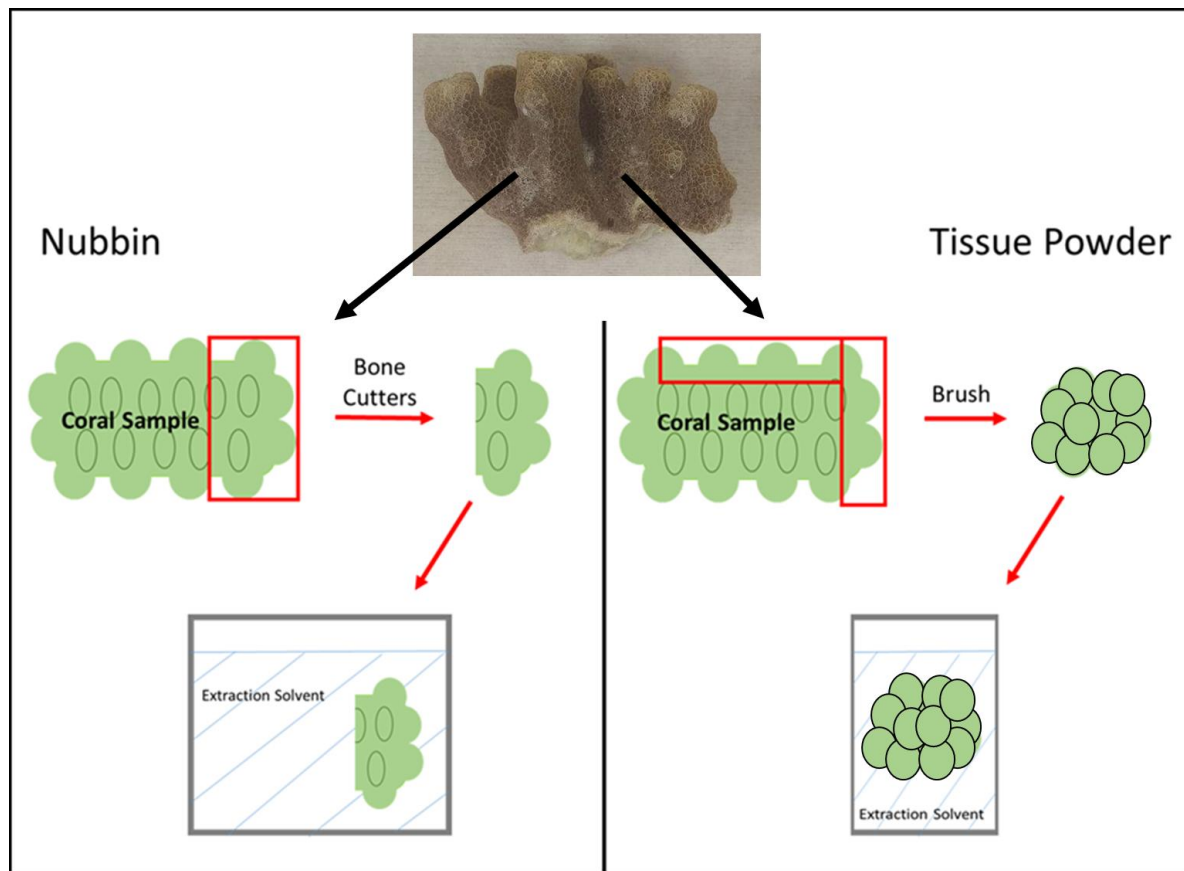

**Table S1.** Sample preparation methods from published coral metabolomics studies. LN<sub>2</sub> = liquid nitrogen; Chl = chloroform; MeOH = methanol; NMR = nuclear magnetic resonance spectroscopy; LC-MS = liquid chromatography-mass spectrometry, LC=MS/MS = liquid chromatography-tandem mass spectrometry; GC-MS = gas chromatography-mass spectrometry; AASP = *Acropora aspera*; APOC = *Astrangia poculata*; MAEQ = *Montipora aequituberculata*; MCAP = *Montipora capitata*; PACU = *Pocillopora acuta*; PDAM = *Pocillopora damicornis*; PMEA = *Pocillopora meandrina*; PIRR = *Porites irregularis*; PLOB = *Porites lobata*; PRUS = *Porites rus*; SHYS = *Seriatopora hystrix*.

| Study                      | Quenching       | Storage    | Preservation | Subsampling   | Extraction                       | Analytical Platform | Species Included                                                                               |
|----------------------------|-----------------|------------|--------------|---------------|----------------------------------|---------------------|------------------------------------------------------------------------------------------------|
| Current                    | LN <sub>2</sub> | -80 °C     | Lyophilized  | Tissue powder | Chl: MeOH: water                 | NMR                 | ACER, OFAV, PCOM,                                                                              |
| Gordon <i>et al.</i> 2013  | LN <sub>2</sub> | -80 °C     | Lyophilized  | Nubbin        | 70% MeOH                         | NMR + LC-MS         | AASP,                                                                                          |
| Parkinson and Baums 2014   | LN <sub>2</sub> | Not stated | Not stated   | Not stated    | acetonitrile: isopropanol: water | LC-MS               | APOC                                                                                           |
| Sogin <i>et al.</i> 2014   | LN <sub>2</sub> | -80 °C     | Lyophilized  | Nubbin        | 70% MeOH                         | NMR                 | MAEQ, PCOM, PDAM, PLOB, SHYS                                                                   |
| Sogin <i>et al.</i> 2016   | LN <sub>2</sub> | Not stated | Not stated   | Homogenized   | acetonitrile: isopropanol: water | GC-MS               | PDAM                                                                                           |
| Quinn <i>et al.</i> 2016   | Not stated      | Not stated | Not stated   | Nubbin        | 70% MeOH                         | LC-MS/MS            | <i>Acropora</i> sp.,<br><i>Montipora</i> sp.,<br><i>Pocillopora</i> sp.,<br><i>Porites</i> sp. |
| Putnam <i>et al.</i> 2016  | Lyophilized     | -80 °C     | Lyophilized  | Nubbin        | 70% MeOH                         | NMR                 | MCAP, PDAM                                                                                     |
| Hillyer <i>et al.</i> 2017 | LN <sub>2</sub> | -80 °C     | Frozen       | Airbrushed    | 100% MeOH                        | GC-MS               | AASP                                                                                           |

|                               |                 |            |             |            |           |          |                                                                                                |
|-------------------------------|-----------------|------------|-------------|------------|-----------|----------|------------------------------------------------------------------------------------------------|
| Sogin <i>et al.</i><br>2017   | LN <sub>2</sub> | -80 °C     | Lyophilized | Nubbin     | 70% MeOH  | NMR      | MAEQ, PACU,<br>PIRR, PLOB,<br>PMEA, PRUS,<br><i>Acropora</i> sp.,<br><i>Montipora</i> sp.      |
| Hartmann <i>et al.</i> 2017   | Not stated      | Not stated | Not stated  | Nubbin     | 70% MeOH  | LC-MS/MS | <i>Acropora</i> sp.,<br><i>Montipora</i> sp.,<br><i>Pocillopora</i> sp.,<br><i>Porites</i> sp. |
| Hillyer <i>et al.</i><br>2018 | LN <sub>2</sub> | -80 °C     | Frozen      | Airbrushed | 100% MeOH | GC-MS    | AASP                                                                                           |

**Table S2.** Complete list of solvent volumes used for metabolite extraction from all three experiments: extraction method comparison, metabolism preservation comparison, and subsampling method comparison. MTBE = Methyl tert-butyl ether; *A. cervicornis* = *Acropora cervicornis*; *O. faveolata* = *Orbicella faveolata*; *P. compressa* = *Porites compressa*.

| Extraction                     | Species               | Polar Solvent System   |                     | Non-polar Solvent System |                    |                     | Total Solvent<br>( $\mu$ l) |
|--------------------------------|-----------------------|------------------------|---------------------|--------------------------|--------------------|---------------------|-----------------------------|
|                                |                       | Methanol<br>( $\mu$ l) | Water<br>( $\mu$ l) | Chloroform<br>( $\mu$ l) | MTBE<br>( $\mu$ l) | Water<br>( $\mu$ l) |                             |
| Bligh and Dyer                 | <i>A. cervicornis</i> | 321                    | 128                 | 321                      | -                  | 161                 | 931                         |
|                                | <i>O. faveolata</i>   | 404                    | 162                 | 404                      |                    | 202                 | 1,172                       |
| MTBE                           | <i>A. cervicornis</i> | 225                    | 75                  | -                        | 750                | 187                 | 1,237                       |
|                                | <i>O. faveolata</i>   | 225                    | 75                  | -                        | 750                | 187                 | 1,237                       |
| Methanol                       | <i>A. cervicornis</i> | 700                    | 300                 | -                        | -                  | -                   | 1,000                       |
|                                | <i>O. faveolata</i>   | 700                    | 300                 | -                        | -                  | -                   | 1,000                       |
| <b>Metabolite Preservation</b> |                       |                        |                     |                          |                    |                     |                             |
| Frozen                         | <i>P. compressa</i>   | 311                    | 125                 | 311                      | -                  | 156                 | 903                         |
| Lyophilized                    | <i>P. compressa</i>   | 375                    | 150                 | 375                      | -                  | 188                 | 1,088                       |
| <b>Subsampling</b>             |                       |                        |                     |                          |                    |                     |                             |
| Nubbin                         | <i>P. compressa</i>   | 3,000                  | 1,200               | 3,000                    | -                  | 1,500               | 8,700                       |
| Tissue Powder                  | <i>P. compressa</i>   | 400                    | 160                 | 400                      | -                  | 200                 | 1,160                       |

**Table S3.** List of  $^1\text{H}$  NMR spectral exclusion regions as determined from blank samples. BD = Bligh and Dyer extraction; MTBE = Methyl tert-butyl ether.

|                                | Excluded Range (ppm) | Putative Compound ID | Peak Multiplicity |
|--------------------------------|----------------------|----------------------|-------------------|
| <b>Extraction</b>              |                      |                      |                   |
| MTBE                           | 1.05-1.07            | unknown              | doublet           |
| MTBE                           | 1.22-1.23            | MTBE                 | singlet           |
| BD, MTBE                       | 1.91-1.92            | acetate              | singlet           |
| MTBE                           | 3.23-3.24            | MTBE                 | singlet           |
| BD, MTBE, methanol             | 4.7-5.0              | water                | distortion        |
| BD                             | 7.67-7.68            | chloroform           | singlet           |
| BD, MTBE                       | 8.45-8.46            | formic acid          | singlet           |
| <b>Metabolism Preservation</b> |                      |                      |                   |
| Frozen, Lyophilized            | 1.90-1.93            | acetate              | singlet           |
| Frozen, Lyophilized            | 3.23-3.29            | unknown              | singlet           |
| Frozen, Lyophilized            | 3.34-3.36            | methanol             | singlet           |
| Frozen, Lyophilized            | 4.7-5.0              | water                | distortion        |
| Frozen, Lyophilized            | 7.66-7.70            | chloroform           | singlet           |
| Frozen, Lyophilized            | 8.45-8.47            | formic acid          | singlet           |
| <b>Subsampling</b>             |                      |                      |                   |
| Nubbin, Tissue Powder          | 1.91-1.92            | acetate              | singlet           |
| Nubbin, Tissue Powder          | 4.7-5.0              | water                | distortion        |
| Nubbin, Tissue Powder          | 8.45-8.46            | formic acid          | singlet           |

**Table S4.** Comparison of *Porites compressa* intra-colony and technical reproducibility in the literature to the current study. Chl = chloroform; MeOH = methanol.

| Study                    | Species             | Preservation | Subsampling   | Extraction       | Spectral %RSD |           |
|--------------------------|---------------------|--------------|---------------|------------------|---------------|-----------|
|                          |                     |              |               |                  | Intra         | Technical |
| Current                  | <i>P. compressa</i> | Lyophilized  | Tissue powder | Chl: MeOH: water | -             | 5.7       |
| Current                  | <i>P. compressa</i> | Lyophilized  | Nubbin        | Chl: MeOH: water | 18.4          | -         |
| Sogin <i>et al.</i> 2014 | <i>P. compressa</i> | Lyophilized  | Homogenized   | 70% MeOH         | -             | 14.2      |
| Sogin <i>et al.</i> 2014 | <i>P. compressa</i> | Lyophilized  | Nubbin        | 70% MeOH         | 15.2          | -         |
